# Supplementary material for: Rapid and accurate alignment of nucleotide conversion sequencing reads with HISAT-3N
Source: HighWire-hosted journal article supplement (doi:10.1101/gr.275193.120), 2021-06-08

# HISAT2

Fast and sensitive alignment against  
general human population

Daehwan Kim  
infphilo@gmail.com

# History about BWT, FM, XBWT, GBWT, and GFM

- BWT (1994) **BWT for Linear path**
  - Burrows M, Wheeler DJ: A Block Sorting Lossless Data Compression Algorithm. Technical Report 124. Palo Alto, CA: Digital Equipment Corporation; 1994.
- FM (2000) **BWT + metadata for fast lookup**
  - Ferragina, P. & Manzini, G. Proc. 41st Annual Symposium on Foundations of Computer Science 390–398 (IEEE Comput. Soc.; 2000).
- XBWT (2009) **BWT for Tree**
  - P. Ferragina, F. Luccio, G. Manzini, and S. Muthukrishnan, “Compressing and Indexing Labeled Trees, with Applications,” J. ACM, vol. 57, no. 1, p. 4, 2009.
- GCSA (2011, 2014) **BWT for Graph**
  - Sirén J, Välimäki N, Mäkinen V (2014) Indexing graphs for path queries with applications in genome research. IEEE/ACM Transactions on Computational Biology and Bioinformatics 11: 375–388. doi: 10.1109/tcbb.2013.2297101
- GFM and HGFM (2015) **GBWT + metadata for fast lookup**
  - Kim D., Paggi J., Salzberg S.L.

# Small example

File #1: kim\_example.fa

```
>kim_example  
GAGCTG
```

File #2: kim\_example.snp

```
r01 single    kim_example 1  T  
r02 deletion  kim_example 4  1  
r03 insertion kim_example 5  A
```

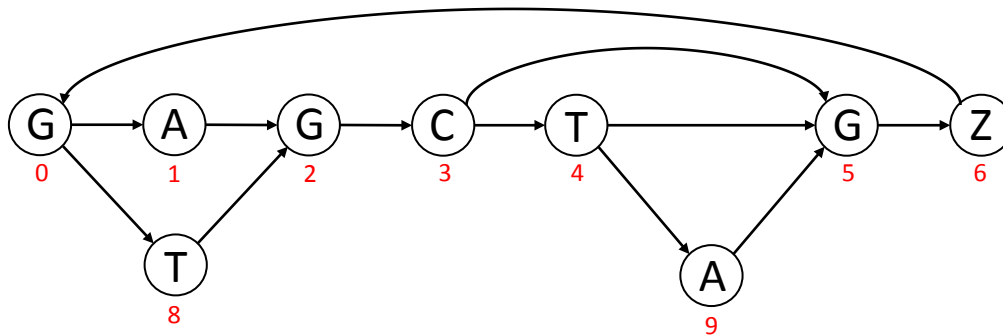

# Requirement for GBWT

## LF property

(LF: Last to First)

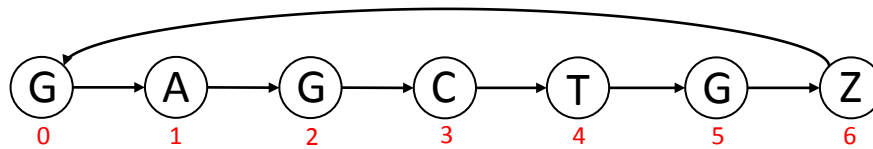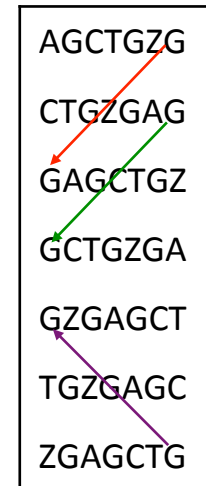

# Requirement for GBWT

## LF property

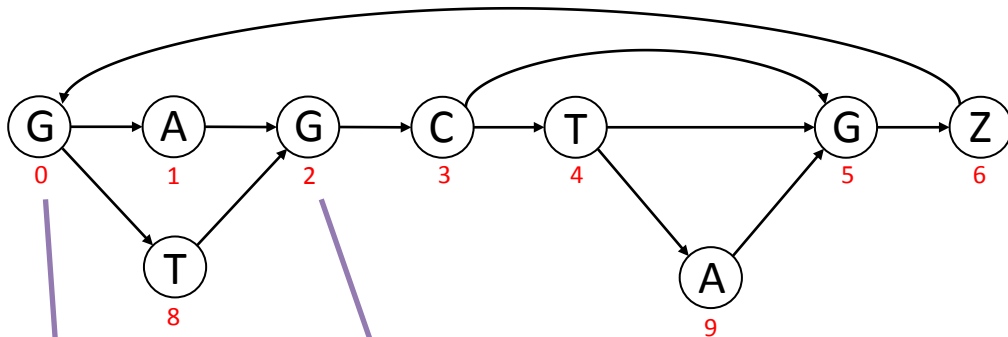

|   |          |
|---|----------|
| 0 | GAGCGZ   |
|   | GAGCTAGZ |
|   | GAGCTGZ  |
|   | GTGCGZ   |
|   | GTGCTAGZ |
|   | GTGCTGZ  |

|   |        |
|---|--------|
| 2 | GCGZ   |
|   | GCTGZ  |
|   | GCTAGZ |

| First |  | Last |
|-------|--|------|
| A (1) |  | G    |
| ...   |  | ...  |
| C (3) |  | G    |
| ...   |  | ...  |
| G (0) |  | ...  |
| G (2) |  | ...  |
| ...   |  | ...  |
| T (8) |  | G    |

# Small example

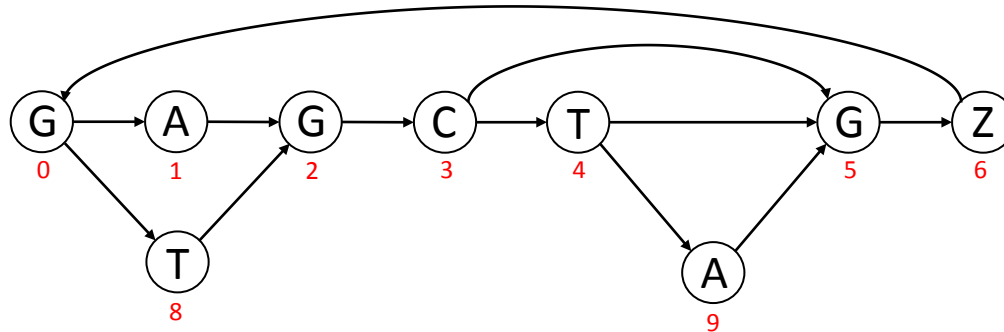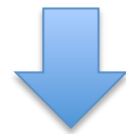

Prefix-doubling and pruning

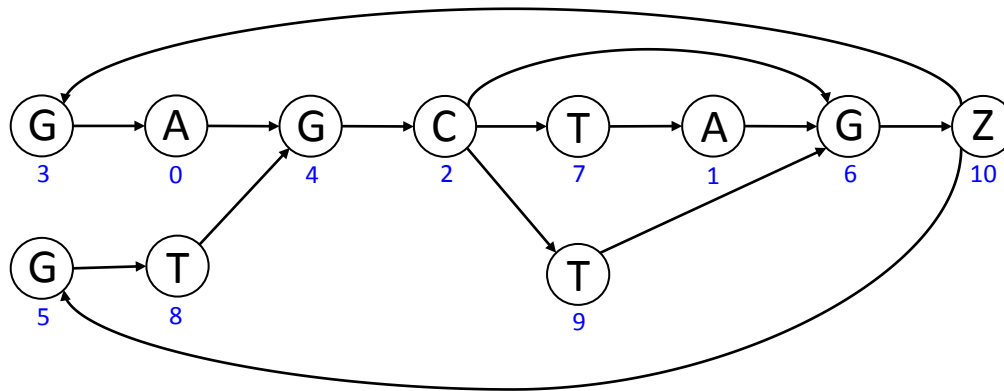

|   |          |
|---|----------|
| 3 | GAGCGZ   |
|   | GAGCTAGZ |
|   | GAGCTGZ  |

|   |        |
|---|--------|
| 4 | GCGZ   |
|   | GCTAGZ |
|   | GCTGZ  |

|   |          |
|---|----------|
| 5 | GTGCGZ   |
|   | GTGCTAGZ |
|   | GTGCTGZ  |

|   |    |
|---|----|
| 6 | GZ |
|---|----|

# Small example

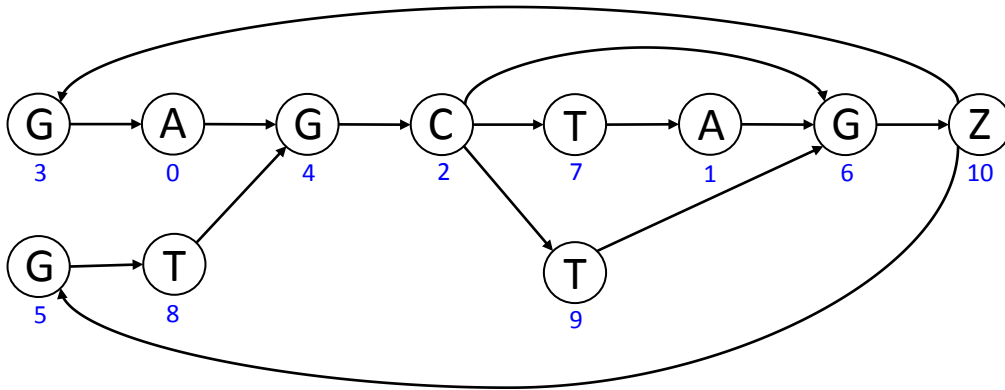

|    | Outgoing edge |       |  | Incoming edge |         |
|----|---------------|-------|--|---------------|---------|
|    | Node ID       | First |  | Last          | Node ID |
| 0  | 0             | A     |  | G             | 0       |
| 1  | 1             | A     |  | T             | 1       |
| 2  | 2             | C     |  | G             | 2       |
| 3  |               |       |  | Z             | 3       |
| 4  |               |       |  | A             | 4       |
| 5  | 3             | G     |  | T             |         |
| 6  | 4             | G     |  | Z             | 5       |
| 7  | 5             | G     |  | A             | 6       |
| 8  | 6             | G     |  | C             |         |
| 9  | 7             | T     |  | T             |         |
| 10 | 8             | T     |  | C             | 7       |
| 11 | 9             | T     |  | G             | 8       |
| 12 | 10            | Z     |  | C             | 9       |
| 13 |               |       |  | G             | 10      |

# Search basics in GBWT

|    | Outgoing edge |       |  | Incoming edge |         |
|----|---------------|-------|--|---------------|---------|
|    | Node ID       | First |  | Last          | Node ID |
| 0  | 0             | A     |  | G             | 0       |
| 1  | 1             | A     |  | T             | 1       |
| 2  | 2             | C     |  | G             | 2       |
| 3  |               |       |  | Z             | 3       |
| 4  |               |       |  | A             | 4       |
| 5  | 3             | G     |  | T             | 5       |
| 6  | 4             | G     |  | Z             |         |
| 7  | 5             | G     |  | A             |         |
| 8  | 6             | G     |  | C             | 6       |
| 9  | 7             | T     |  | T             |         |
| 10 | 8             | T     |  | C             | 7       |
| 11 | 9             | T     |  | G             | 8       |
| 12 | 10            | Z     |  | C             | 9       |
| 13 |               |       |  | G             | 10      |

For a query string,

- we search base by base from right to left.
- two different ranges exist
  - node range [0, 10]
  - bwt range [0, 13]
- search:

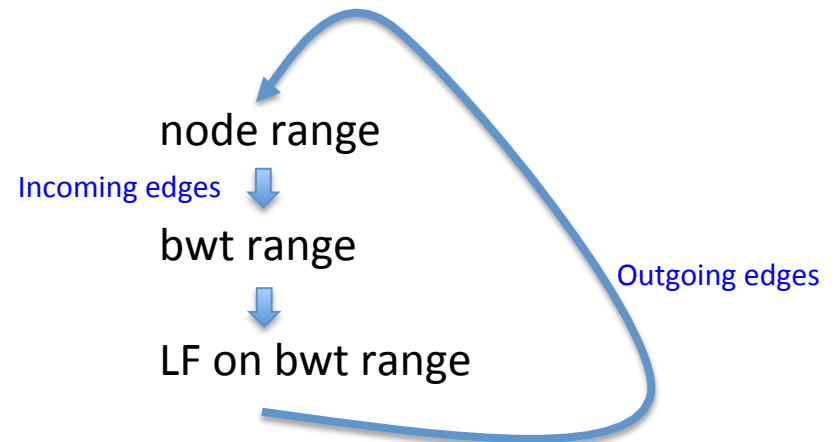



# Small example - TAG

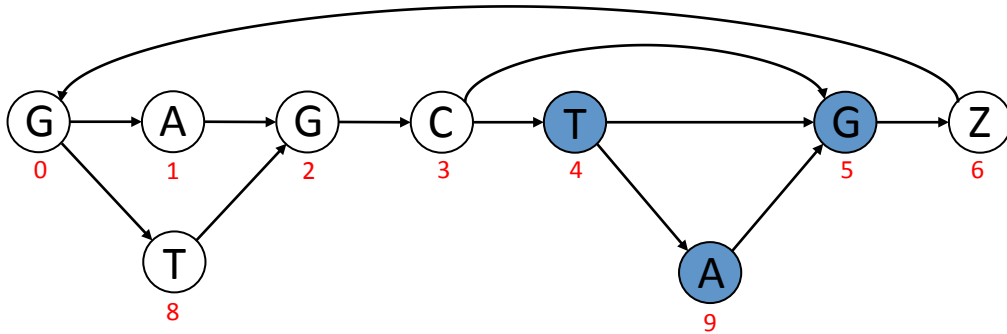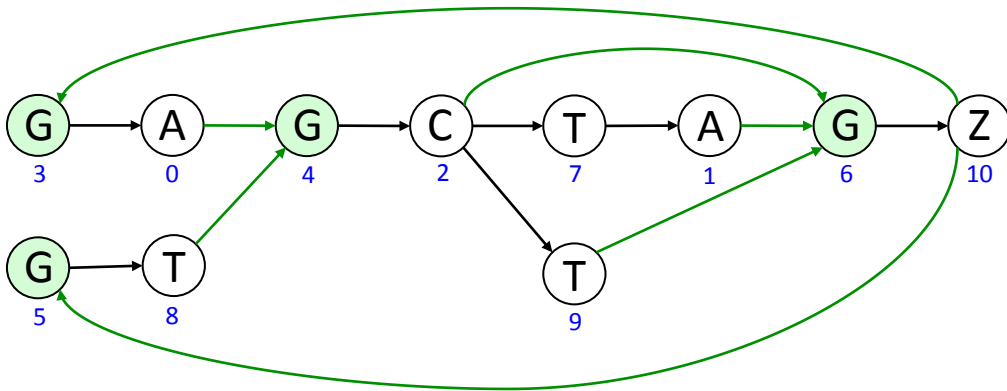

|    | Outgoing edge |       | Incoming edge |         |
|----|---------------|-------|---------------|---------|
|    | Node ID       | First | Last          | Node ID |
| 0  | 0             | A     | G             | 0       |
| 1  | 1             | A     | T             | 1       |
| 2  | 2             | C     | G             | 2       |
| 3  |               |       | Z             | 3       |
| 4  |               |       | A             | 4       |
| 5  | 3             | G     | T             | 5       |
| 6  | 4             | G     | Z             |         |
| 7  | 5             | G     | A             |         |
| 8  | 6             | G     | C             | 6       |
| 9  | 7             | T     | T             |         |
| 10 | 8             | T     | C             | 7       |
| 11 | 9             | T     | G             | 8       |
| 12 | 10            | Z     | C             | 9       |
| 13 |               |       | G             | 10      |

# Small example - TAG

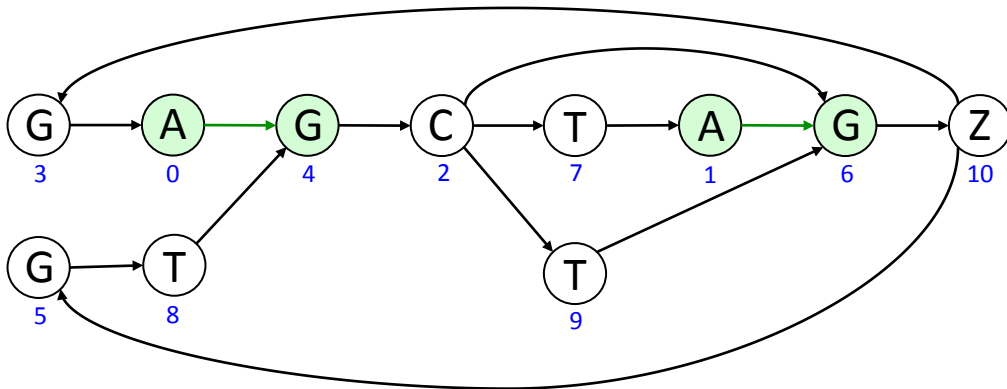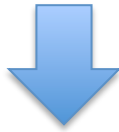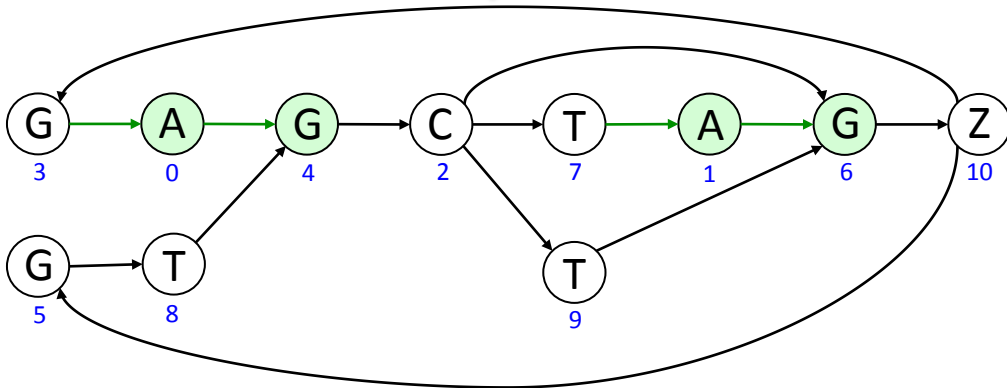

|    | Outgoing edge |       | Incoming edge |         |
|----|---------------|-------|---------------|---------|
|    | Node ID       | First | Last          | Node ID |
| 0  | 0             | A     | G             | 0       |
| 1  | 1             | A     | T             | 1       |
| 2  | 2             | C     | G             | 2       |
| 3  |               |       | Z             | 3       |
| 4  |               |       | A             | 4       |
| 5  | 3             | G     | T             |         |
| 6  | 4             | G     | Z             | 5       |
| 7  | 5             | G     | A             | 6       |
| 8  | 6             | G     | C             |         |
| 9  | 7             | T     | T             |         |
| 10 | 8             | T     | C             | 7       |
| 11 | 9             | T     | G             | 8       |
| 12 | 10            | Z     | C             | 9       |
| 13 |               |       | G             | 10      |

# Small example - TAG

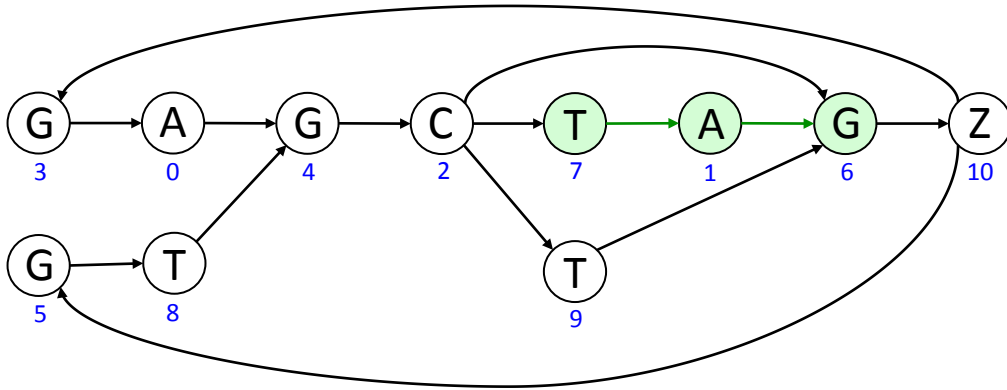

|    | Outgoing edge |       | Incoming edge |         |
|----|---------------|-------|---------------|---------|
|    | Node ID       | First | Last          | Node ID |
| 0  | 0             | A     | G             | 0       |
| 1  | 1             | A     | T             | 1       |
| 2  | 2             | C     | G             | 2       |
| 3  |               |       | Z             | 3       |
| 4  |               |       | A             | 4       |
| 5  | 3             | G     | T             |         |
| 6  | 4             | G     | Z             | 5       |
| 7  | 5             | G     | A             | 6       |
| 8  | 6             | G     | C             |         |
| 9  | 7             | T     | T             |         |
| 10 | 8             | T     | C             | 7       |
| 11 | 9             | T     | G             | 8       |
| 12 | 10            | Z     | C             | 9       |
| 13 |               |       | G             | 10      |

# Node ID & BWT char to bits

|    | Outgoing edge |       |   | Incoming edge |         |
|----|---------------|-------|---|---------------|---------|
|    | Node ID       | First |   | Last          | Node ID |
| 0  | 0             | A     |   | G             | 0       |
| 1  | 1             | A     |   | T             | 1       |
| 2  | 2             | C     |   | G             | 2       |
| 3  |               |       |   | Z             | 3       |
| 4  |               |       |   | A             | 4       |
| 5  | 3             | G     | T |               |         |
| 6  | 4             | G     |   | Z             | 5       |
| 7  | 5             | G     |   | A             | 6       |
| 8  | 6             | G     |   | C             |         |
| 9  | 7             | T     |   | T             |         |
| 10 | 8             | T     |   | C             | 7       |
| 11 | 9             | T     |   | G             | 8       |
| 12 | 10            | Z     |   | C             | 9       |
| 13 |               |       |   | G             | 10      |

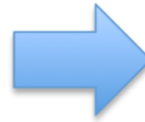

|    | Outgoing edge |       |        | Incoming edge |             |
|----|---------------|-------|--------|---------------|-------------|
|    | Node ID       | First |        | Last          | Node ID     |
| 0  | 1             | 2     |        | 10            | 1           |
| 1  | 1             |       |        | 11            | 1           |
| 2  | 1<br>0<br>0   | 3     |        | 10            | 1           |
| 3  |               |       |        | 00 (Z)        | 1           |
| 4  |               |       |        | 00            | 1<br>0      |
| 5  | 1             | 4     | 11     |               |             |
| 6  | 1             |       | 00 (Z) | 1             |             |
| 7  | 1             |       |        | 00            | 1<br>0<br>0 |
| 8  | 1             |       | 01     |               |             |
| 9  | 1             | 3     | 11     |               |             |
| 10 | 1             |       |        | 01            | 1           |
| 11 | 1             |       |        | 10            | 1           |
| 12 | 1<br>0        | 2     |        | 01            | 1           |
| 13 |               |       |        | 10            | 1           |

## Graph FM index (GFM)

- Block size is 128 bytes (each cell represents four bytes in the table below, there are 32 cells).
  - Five 4-bytes (a total of 20 bytes) used to store numbers such as accumulated occurrences of A, C, G, T, and 1 bits in O array.
  - One 4-bytes used to store the corresponding location of 1 in IN for 1 in OUT.
  - Remaining 104 bytes used to represent 208 gbwt characters along, 208 bits from IN and OUT arrays each.

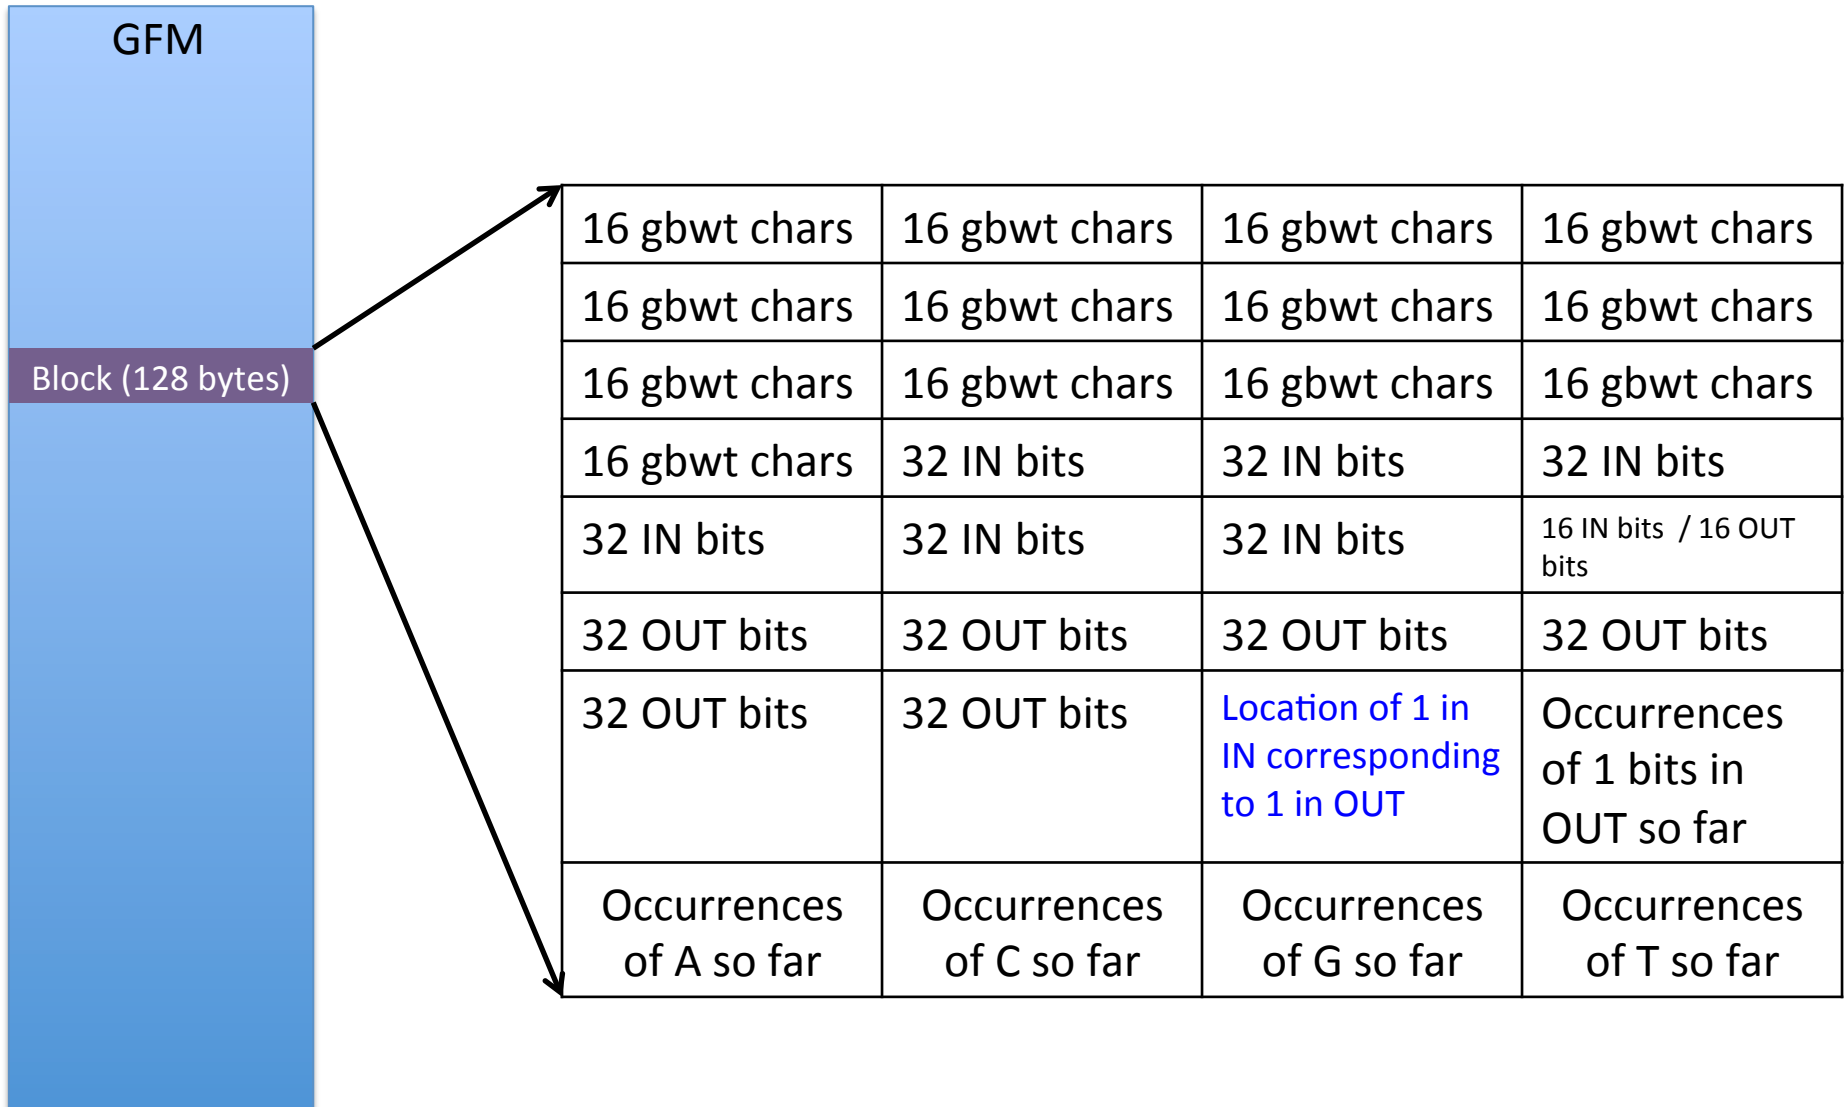

# HGFM – Hierarchical Graph FM index

## Global index

GFM index  
for the entire human genome  
and ~12.3 million SNPs

## Local indexes

GFM index  
for chr1 from 1 to 56K

GFM index  
for chr1 from 55K to 111K

GFM index  
for chr1 from 110K to 166K

⋮

GFM index  
for chrY from 1 to 56K

⋮

~55,000  
indexes

# HISAT2 index files

- Out1 (GFM)
  - Ref. names written at the end
- Out2 (Offset)
- Out3 (Ref. seq. contig information)
- Out4 (Ref. seq.)
- Out5 (Local GFMs)
- Out6 (Local offsets)
- Out7 (SNPs)
- Out8 (SNP IDs)

# Index sizes for HISAT2, HISAT and Bowtie2 based on GRCh37 and ~12.3 million SNPs

| HISAT2 (HGFM) |               | HISAT2 (HFM)    |               | HISAT (HFM)  |               | Bowtie2 (FM)     |               |
|---------------|---------------|-----------------|---------------|--------------|---------------|------------------|---------------|
| genome.1.ht2  | 1863 MB       | genome_FM.1.ht2 | 783 MB        | genome.1.bt2 | 913 MB        | genome.1.bt2     | 913 MB        |
| genome.2.ht2  | 752 MB        | genome_FM.2.ht2 | 682 MB        | genome.2.bt2 | 682 MB        | genome.2.bt2     | 682 MB        |
| genome.3.ht2  | 1 MB          | genome_FM.3.ht2 | 1 MB          | genome.3.bt2 | 1 MB          | genome.3.bt2     | 1 MB          |
| genome.4.ht2  | 682 MB        | genome_FM.4.ht2 | 682 MB        | genome.4.bt2 | 682 MB        | genome.4.bt2     | 682 MB        |
| genome.5.ht2  | 1999 MB       | genome_FM.5.ht2 | 1146 MB       | genome.5.bt2 | 1145 MB       |                  |               |
| genome.6.ht2  | 721 MB        | genome_FM.6.ht2 | 695 MB        | genome.6.bt2 | 693 MB        |                  |               |
| genome.7.ht2  | 236 MB        | genome_FM.7.ht2 | 1 M           |              |               |                  |               |
| genome.8.ht2  | 129 MB        | genome_FM.8.ht2 | 1 M           |              |               |                  |               |
|               |               |                 |               |              |               | genome.rev.1.bt2 | 913 MB        |
|               |               |                 |               |              |               | genome.rev.2.bt2 | 682 MB        |
| <b>Total</b>  | <b>6.2 GB</b> |                 | <b>3.9 GB</b> |              | <b>4.0 GB</b> |                  | <b>3.8 GB</b> |



# SAM output from HISAT2

read1 1 673181 100M

CTGAGGAAAGATGTTGAAATGTGACAAGTAAAGTAATATGAGTTCTTTTGACTATGTAAAATAATCAAACAAAAAATGACTTACTAAATTATAATACCCT

AS:i:0 XM:i:0 NM:i:0 MD:Z:50T49 Zs:Z:50|S|rs529937446

read2 1 769089 50M2D50M

ATTCCTGAAAATAATATCCAAGATGCAAAGCATATGGCTCTGGTGAGACGTGTGAGGAGCTGAGAATGAGACGGCTGAGTGTCTGGGGGCAGATCACGA

AS:i:0 XM:i:0 NM:i:0 MD:Z:50^AT50 Zs:Z:50|D|rs59306077

read3 1 843891 50M3I47M

GACAGGGGAGGTGACAGAGGGAGGGGAGGGGGAGGAGGGGCGGGGAGAGGATGAGGGAAAAGGGGGAGGCGATGGGACGGGGGAGGGAATGGG  
GGAACA

AS:i:0 XM:i:0 NM:i:0 MD:Z:97 Zs:Z:50|I|rs199636838

# Two simulated data sets

From 12.3 million SNPs,

1) **ref. reads**: 12.3 million reads that are exactly the same as reference genome.

2) **alt. reads**: 12.3 million reads that contain a SNP in the middle and otherwise are exactly the same as reference genome.

(Reads are 100-bp long and single-end.)

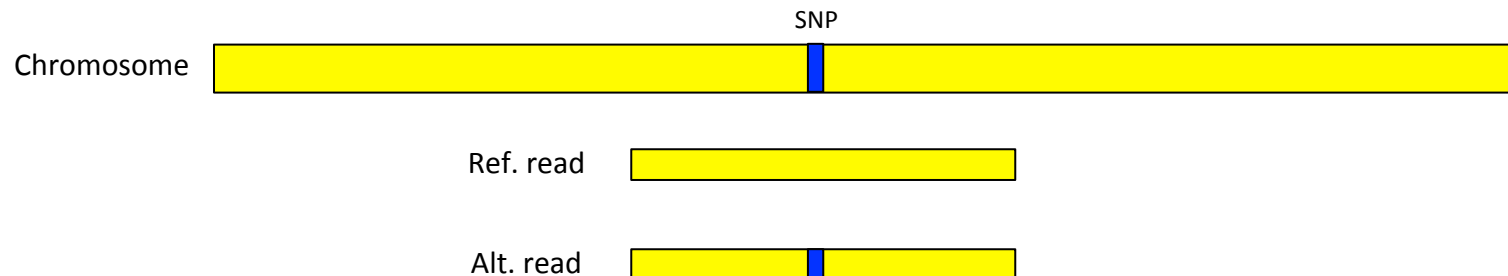

# Runtime and alignment sensitivity for HISAT2, HISAT and Bowtie2

|                          | Ref. reads                                                           |        |                               |                                 | Alt. reads                                                                                         |        |                               |                                 |
|--------------------------|----------------------------------------------------------------------|--------|-------------------------------|---------------------------------|----------------------------------------------------------------------------------------------------|--------|-------------------------------|---------------------------------|
|                          | Runtime                                                              | Memory | Alignment sensitivity (first) | Alignment sensitivity (+others) | Runtime                                                                                            | Memory | Alignment sensitivity (first) | Alignment sensitivity (+others) |
| HISAT2 (HGFM)            | 8 m 53 s                                                             | 6.7 GB | 98.56 %                       | 99.14 %                         | 9 m 54 s                                                                                           | 6.7 GB | 98.95 %                       | 99.31 %                         |
| HISAT2 (HFM)             | 4 m 17 s                                                             | 4.0 GB | 98.92 %                       | 99.48 %                         | 7 m 40 s                                                                                           | 4.0 GB | 94.77 %                       | 95.15 %                         |
| HISAT (HFM)              | 5 m 16 s                                                             | 4.1 GB | 98.71 %                       | 99.25 %                         | 8 m 25 s                                                                                           | 4.1 GB | 94.98 %                       | 95.41 %                         |
| Bowtie2 (FM) <b>-k 5</b> | 5 m 30 s                                                             | 3.1 GB | 98.93 %                       | 99.54 %                         | <=====<br><b>--score-min C,0</b> to use FM index only<br>(without seeding and dynamic programming) |        |                               |                                 |
| Bowtie2 (FM) <b>-k 5</b> | =====><br>Use the default setting to allow for mismatches and indels |        |                               |                                 | 1 h 48 m                                                                                           | 3.1 GB | 97.90 %                       | 98.94 %                         |

# Transcriptome mapping

TopHat2

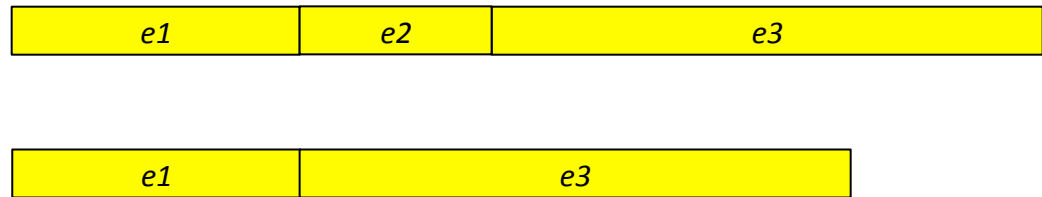

HISAT2

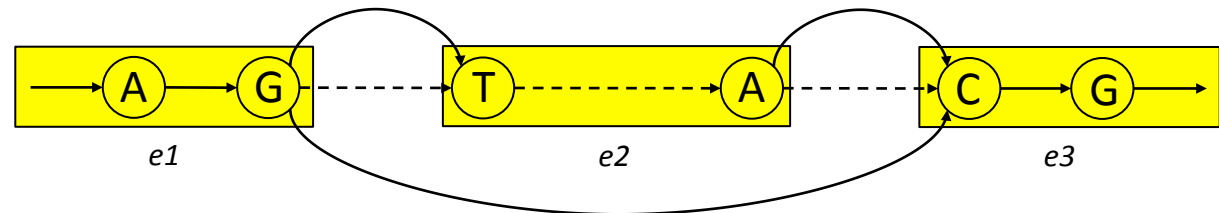

# Path-doubling example

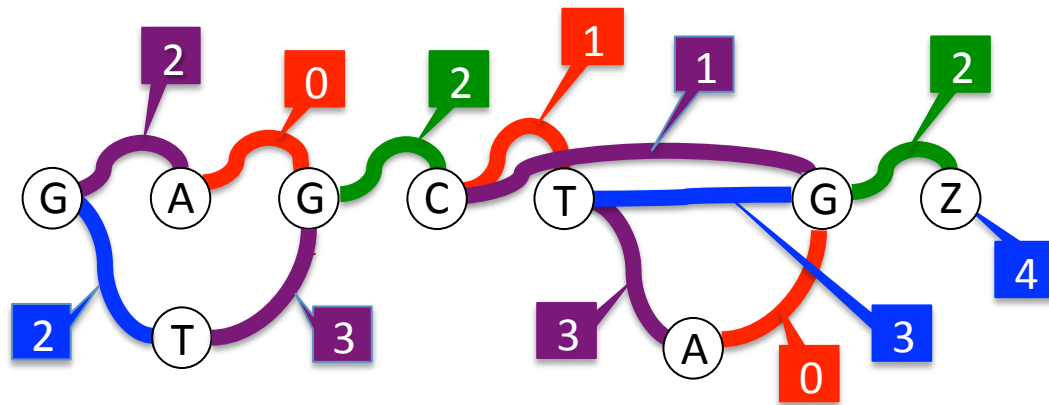

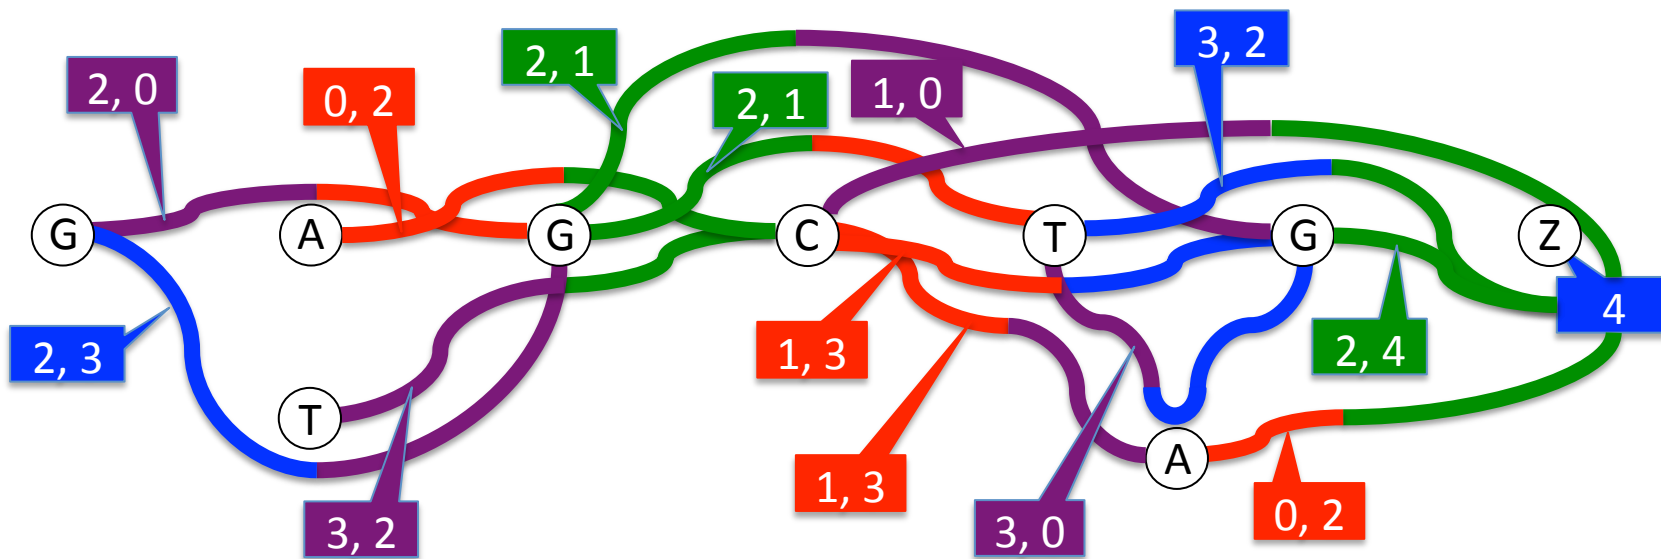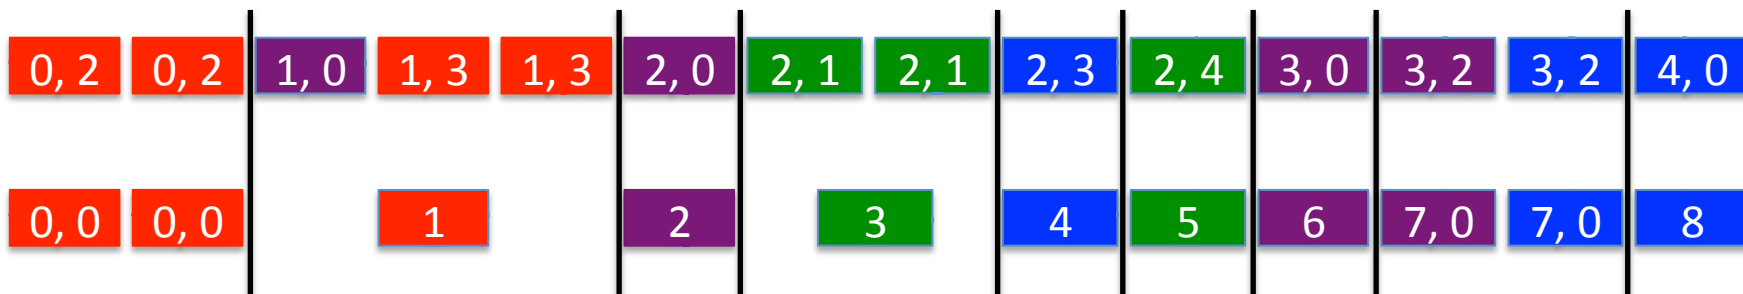

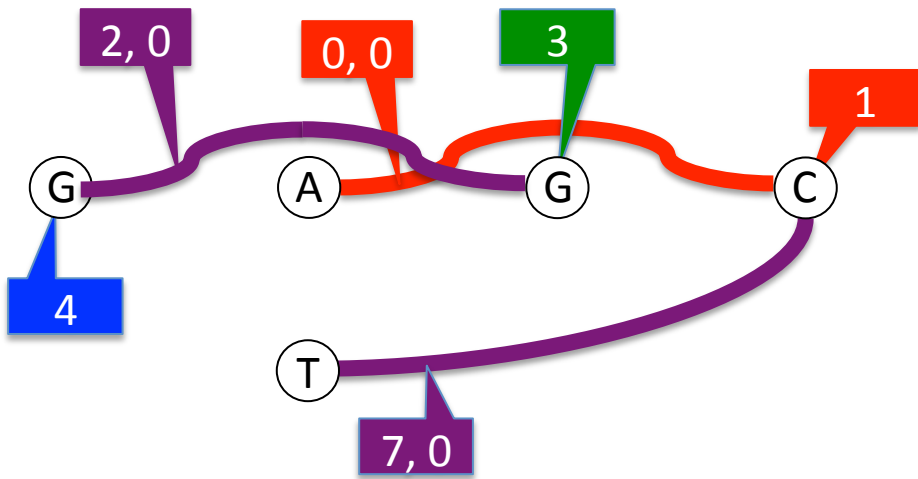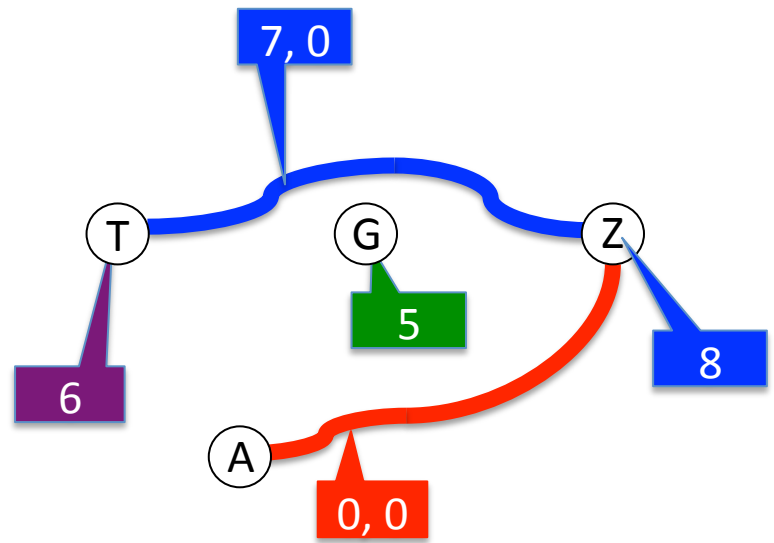

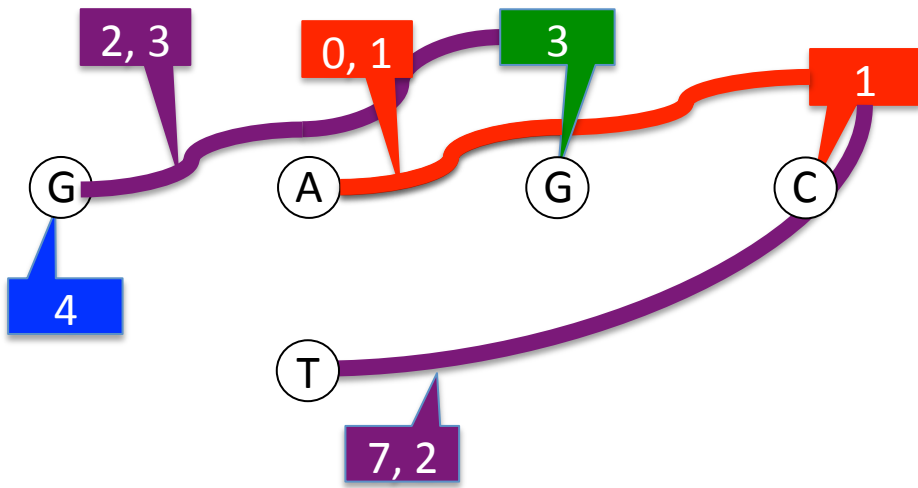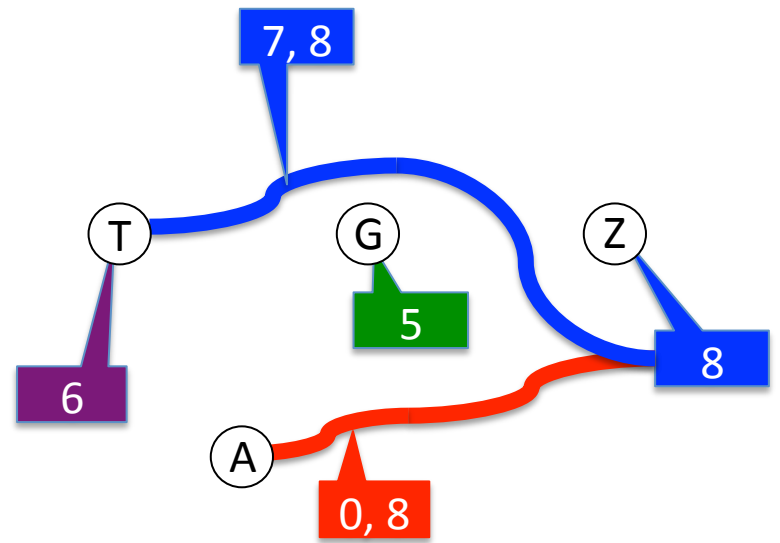



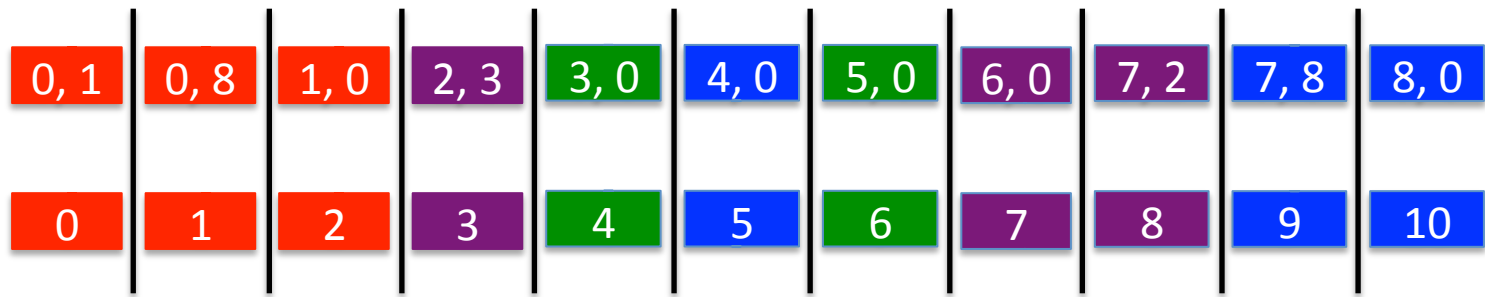

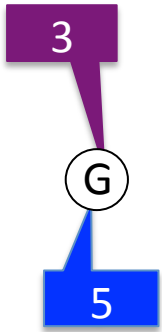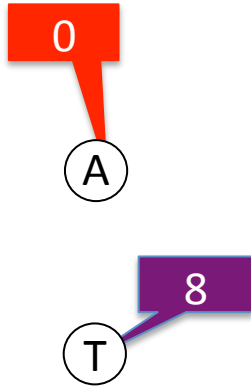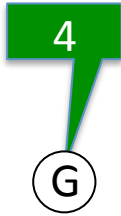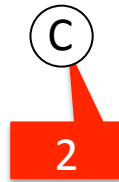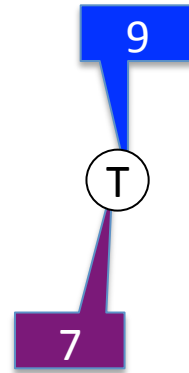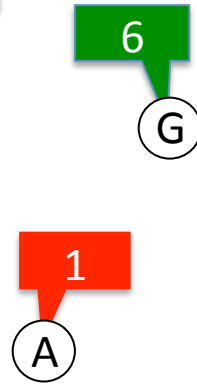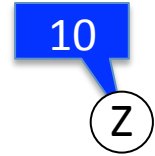

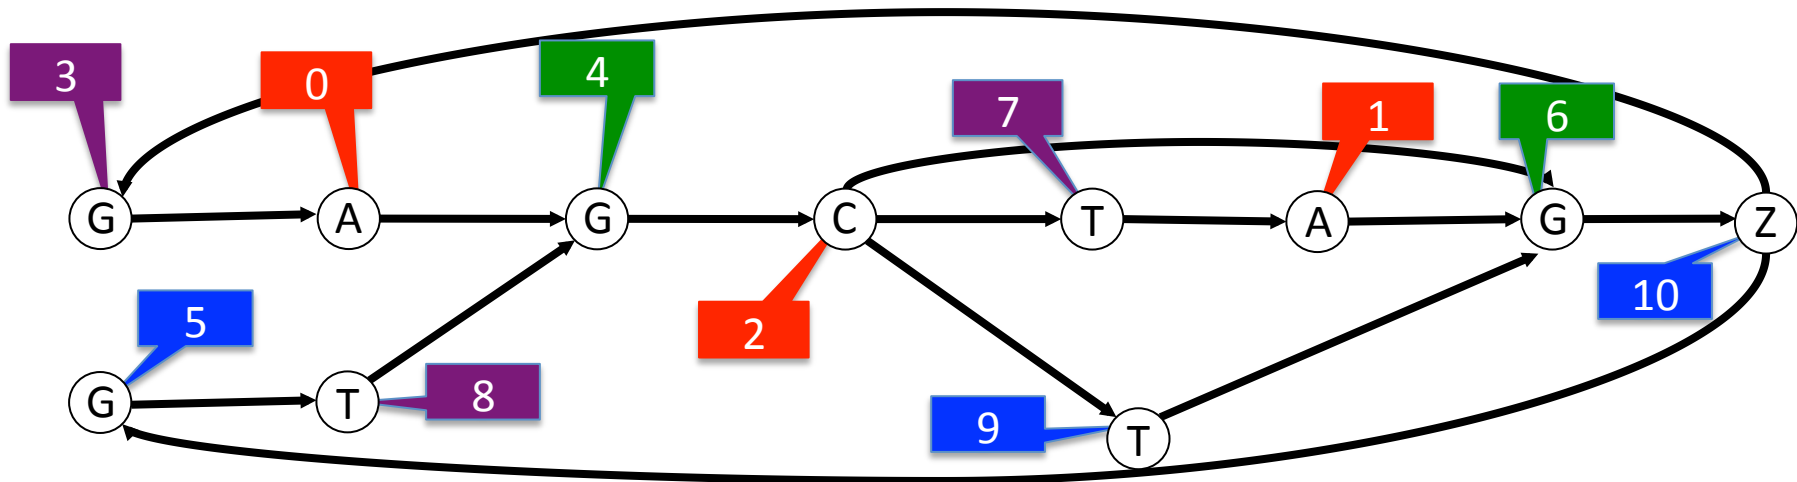

Supplement: Supplemental_Code_.zip [file HISAT2-first_release-Sept_8_2015.pdf › hisat-3n/docs/assets/data/HISAT2-first_release-Sept_8_2015.pdf]
